# Supplementary material
Source: HighWire-hosted journal article supplement (http://www.cmajopen.ca/highwire/filestream/81051/field_highwire_adjunct_files/0/2017-0131_original_submission.pdf)
Supplement: 2017-0131_original_submission.pdf [file 2017-0131_original_submission.pdf]

1  
2  
3  
4  
5  
6  
7  
8  
9  
10  
11  
12  
13

## Geographic variation of the provider of screening colonoscopy care in Canada: Rural surgeons and urban gastroenterologists?

Aristithes G. Doumouras, MD MPH<sup>1,2</sup>, Sama Anvari<sup>2</sup>, Margherita Cadeddu MD<sup>1,2</sup>, Mehran Anvari MD, PhD<sup>1,2</sup> Dennis Hong, MD, MSc<sup>1,2</sup>

<sup>1</sup> Department of Surgery, McMaster University, Hamilton, Ontario, Canada

<sup>2</sup> Division of General Surgery, St. Joseph's Healthcare, Hamilton, Ontario, Canada

19  
20  
21  
22  
23  
24  
25  
26  
27  
28  
29

**Funding:** No funding to declare.

**Conflict of Interest:** The authors have no conflicts of interest to declare.

**Word Count:** 2493

**Abstract Word Count:** 246

All authors made substantial contributions to the conception and design of work as well as the interpretation of the data, critically revising the manuscript, giving final approval and have accountability for the manuscript. The acquisition and analysis of data as well as initial drafting of the manuscript was completed by AGD, SA and DH.

**Video Abstract:** Upon acceptance a video abstract will be provided.

30  
31  
32  
33  
34  
35  
36  
37  
38  
39  
40  
41  
42  
43  
44  
45  
46  
47  
48  
49  
50  
51  
52  
53  
54  
55  
56  
57  
58  
59  
60

**Address all correspondence to:**

Dennis Hong, MD, MSc

Division of General Surgery, St. Joseph's Healthcare,

Room G814, 50 Charlton Avenue East, Hamilton,

Ontario, Canada. L8N 4A6.

Phone: 905 522 1155 ext. 32938.

Fax: (905) 521-6123.

E-mail: dennishong70@gmail.com

Category: Socioeconomic Issues

1  
2  
3  
4  
5 **Background:** Screening colonoscopies for detection of colorectal carcinoma (CRC) may be  
6  
7 provided by several specialties. Few studies have assessed geographic variations in delivery of  
8  
9 this care. Our objective was to investigate how geographic and socioeconomic factors impact the  
10  
11 provider of colonoscopic care.  
12

13  
14 **Methods:** This was a population-based cohort of all screening colonoscopies performed at  
15  
16 Canadian publicly funded health facilities between April 2008 and March 2015. The main  
17  
18 outcome of interest was the proportion of colonoscopies performed by surgeons at the  
19  
20 neighbourhood level. Predictors of interest included socioeconomic and geographic variables.  
21  
22 Spatial analysis was used to analyze significant clustering of practitioner services. Multinomial  
23  
24 logistic regression was used to model predictors.  
25  
26  
27

28  
29 **Interpretation:** From 2008-2015, we identified 658,113 screening colonoscopies by 1,886  
30  
31 providers, of which 53.7% were performed by surgeons. Of all neighbourhoods, 24.2% were  
32  
33 located within clusters predominantly served by gastroenterologists and 19.5% were within  
34  
35 surgeon clusters. Rural neighborhoods had significantly increased relative risk of being within a  
36  
37 surgeon cluster (RRR 5.38; 95%CI 3.38-8.01  $p < 0.001$ ) compared to mixed clusters and nearly  
38  
39 100 times higher relative risk than gastroenterology clusters (RRR 98.95; 95%CI 15.3-427.2  
40  
41  $p < 0.001$ ). Compared to mixed clusters, highest socioeconomic status neighbourhoods were 1.74  
42  
43 times likelier to be in gastroenterologist clusters (95%CI 1.14-2.56  $p = 0.005$ ). Surgeons provide a  
44  
45 large proportion of colonoscopies and are essential for access to care, particularly in rural  
46  
47 regions. Though absolute numbers may vary, similar patterns may exist in other countries due to  
48  
49 the nature of the specialty.  
50  
51  
52  
53  
54  
55  
56  
57  
58  
59  
60

## INTRODUCTION

Colorectal cancer is the third most commonly diagnosed and fourth most common cause of cancer-related death in men and women worldwide, respectively.<sup>1</sup> In 2012, 1.4 million people were diagnosed with colorectal cancer and it was estimated that 700,000 of these individuals will die from the disease.<sup>1</sup> High disease incidence and mortality have led to the development of multiple screening modalities, many of which detect and remove colonic polyps that are precursors to many colorectal cancers.<sup>2</sup> Of these, colonoscopy is most sensitive test for detection of colorectal cancer and adenomas.<sup>3</sup> As a common primary screening test, colonoscopy has been shown to decrease the mortality and incidence of colorectal cancer<sup>4,5</sup>, and was suggested to be a more effective screening tool compared to both guaiac-based fecal occult blood testing and flexible sigmoidoscopy by recent meta-analysis.<sup>6</sup>

Conflicting literature has emerged as to whether endoscopist specialty affects patient outcomes. Some studies have found that patients who underwent colonoscopy performed by a gastroenterologist were significantly more likely to have polyps detected<sup>7-9</sup> and removed<sup>10</sup>, had lower rates of bowel perforation<sup>11</sup>, and were less likely to later develop colorectal cancer<sup>12</sup>, compared to those treated by general surgeons or other specialties. It is suggested that this may reflect the extensive formal training gastroenterologists undergo as part of their core training requirements.<sup>12</sup> However, others have found there to be no significant difference in polyp detection<sup>13</sup> or complication rates<sup>14</sup> between gastroenterologists and surgeons, with at least one study finding that gastroenterologists to have significantly higher total complication rates than surgeons.<sup>13</sup> Despite these findings, little is known as to whether the populations these specialties serve are the same and how important each is to the delivery of colonoscopy care, as provider delivery in urban and rural areas was found to vary.<sup>15</sup> Residents of rural areas have also been

1  
2  
3 shown to have lower screening rates than those in urban areas<sup>16-18</sup> and had a higher proportion of  
4  
5 their colonoscopies done by general surgeons.<sup>15</sup> In addition, the nature of each profession differs  
6  
7 and allows for varied roles in the delivery of endoscopy. Gastroenterologists can be more  
8  
9 focused and have a high volume endoscopy practice but their specialty may not be as suitable to  
10  
11 rural areas.  
12

13  
14  
15 Few studies have investigated geographic variations in the delivery of colonoscopy care  
16  
17 and what factors affect that variation. This information is vital to understanding and planning the  
18  
19 delivery of colonoscopic care as well as contextualizing differences in outcomes. As such, the  
20  
21 purpose of this study was to investigate variations in the delivery of screening colonoscopies by  
22  
23 specialty across Canada.  
24  
25  
26  
27  
28

## 29 **MATERIALS & METHODS**

### 30 31 32 33 34 *Study Design and Setting*

35  
36 This was a national retrospective cohort study of all adult (age  $\geq 18$ ) patients undergoing  
37  
38 screening colonoscopy in a publicly funded facility between April 2008 and March 2015 in  
39  
40 Canada (excluding the province of Quebec). Screening colonoscopy guidelines are relatively  
41  
42 similar across Canada.<sup>3</sup>  
43  
44  
45  
46  
47

### 48 *Data Sources and Definitions*

49  
50 Patient procedure, provider, distance and neighbourhood data were derived from the  
51  
52 Canadian Institute for Health Information Discharge Abstract Database. Quebec was excluded as  
53  
54 its data are not accessible directly from the Canadian Institute for Health Information, but only  
55  
56  
57  
58  
59  
60

## Colonoscopy provider variation

1  
2  
3 through the Quebec Ministry of Health and Social Services. Screening colonoscopy was  
4 identified by a colonoscopy procedure clarified by a screening diagnosis code. Neighbourhoods  
5 were defined as forward sortation areas, which are denoted by the first three digits of the postal  
6 code and are a unit of area used by the Canadian postal system. There are approximately 1,200  
7 forward sortation areas in Canada (excluding Quebec). Forward sortation area geographic data  
8 were derived from the 2013 Canadian census files.<sup>19</sup> Neighbourhood income data were derived  
9 from Statistics Canada and rurality was defined through the postal code.<sup>20,21</sup> The median  
10 individual income for each neighbourhood was the specific income measure used and was  
11 derived from Statistics Canada.<sup>21</sup>

*Outcome measures and regression variables*

12  
13  
14  
15  
16  
17  
18  
19  
20  
21  
22  
23  
24  
25  
26  
27  
28  
29  
30  
31  
32  
33  
34  
35  
36  
37  
38  
39  
40  
41  
42  
43  
44  
45  
46  
47  
48  
49  
50  
51  
52  
53  
54  
55  
56  
57  
58  
59  
60  
The main outcome of interest in this study was the neighborhood ratio of screening  
colonoscopies done by surgeons versus gastroenterologists/internists. Colonoscopies done by  
other providers accounted for less than 2% of all colonoscopies and were excluded. The main  
geographic and socioeconomic factors of interest were distance to the colonoscopy facility,  
neighbourhood rurality and neighbourhood socioeconomic status

*Statistical Analysis*

56  
57  
58  
59  
60  
The main outcome was calculated as the percent of total colonoscopies within a  
neighborhood that were done by surgeons. To determine the spatial relationship between  
neighborhoods and specialty, a geographic cluster analysis was undertaken using the Getis-Ord-  
Gi\* statistic. This statistic determines whether the neighbourhood and all of its adjacent  
neighbors is significantly different from the overall mean. For this analysis, neighbourhood

connectivity was defined as having an adjacent border. Neighbourhood clusters were then classified as a surgeon cluster, a gastroenterologist cluster high use or a mixed cluster. Spatial analyses were carried out using the ArcGIS Desktop suite (Environmental Systems Research Institute ArcMap10.1, Redlands, CA). Univariable comparisons of geographic and socioeconomic factors across surgical rate groups and clusters were compared using ANOVA or chi-square where appropriate. To determine the effect of the neighbourhood and socioeconomic factors on neighbourhood cluster status, a multilevel multinomial logistic regression was used with the geographic and socioeconomic factors as fixed effects and the provinces as random effects. Importantly, this methodology allows for an unbiased evaluation of the effects by accounting for the utilization differences between provinces. Results were presented as surgeon and gastroenterologist neighborhoods compared to mixed neighborhoods, respectively, as well as surgeon neighborhoods compared directly to gastroenterologist neighborhoods. Due to the use of multinomial regression, relative risk ratios (RRRs) with 95% confidence intervals (CI) were reported. Statistical significance was set at  $p < 0.05$ . Stata software (StataCorp. 2013. *Stata Statistical Software: Release 12.1*. College Station, TX: StataCorp LP) and MLwiN (Version 2.26; Centre for Multilevel Modeling, University of Bristol) were used for data analysis.

## RESULTS

Table 1 presents the associations between and the covariates of interest. Overall, 658,113 were performed over the time period with 53.7% being performed by surgeons ( $n=353,165$ ). In relation to geographic variables, surgeons performed 100,195 colonoscopies in rural areas comprising 28.4% of their total colonoscopies compared to 37,893 (12.4%) for gastroenterologists. More than 32.9% of colonoscopies done by gastroenterologists were done in

## Colonoscopy provider variation

1  
2  
3 neighborhoods with a higher socioeconomic status compared to 17.7% for surgeons. People  
4  
5  
6 undergoing colonoscopy by surgeons travelled further compared to those treated by  
7  
8 gastroenterologists (27.0 vs 21.3km).  
9

10  
11 Figure 1 and Table 2 present the results of the cluster analysis. There were 1,114  
12  
13 neighborhoods analyzed in the cluster analysis found that 270 were within a cluster that had  
14  
15 significantly higher rates of gastroenterologist care, while 217 were within a surgeon cluster. In  
16  
17 gastroenterology clusters, surgeons performed 22.7% of colonoscopies, whereas in mixed  
18  
19 clusters and surgeon clusters that performed 53.5% and 83.0% respectively. Of the  
20  
21 gastroenterology clusters, only 2 (0.7%) of the gastroenterologist cluster neighborhoods were  
22  
23 rural areas compared to 75 (34.6%) for surgeon cluster neighborhoods. Additionally, 63.0% of  
24  
25 gastroenterologist neighborhoods were in the two highest categories as economic status  
26  
27 neighborhoods compared to 31.8% for surgeons. Surgeon cluster neighborhoods were also nearly  
28  
29 42 km further from the hospital that provided colonoscopy care compared to gastroenterologist  
30  
31 clusters (59.4 vs 17.7km). When considering Figure 1, the red areas are surgeon clusters while  
32  
33 blue are gastroenterologist clusters. This clearly shows the role predominance of the surgeon  
34  
35 clusters, while major urban areas tend to be served by gastroenterologists with suburban areas as  
36  
37 well a smaller cities generally of mixed delivery between surgeons and gastroenterologists.  
38  
39  
40  
41  
42

43  
44 Table 3 presents the results of the multinomial analysis, which looked at the differences  
45  
46 between the surgeon and gastroenterologist predominant neighborhoods compared to the mixed  
47  
48 neighborhoods. Compared to a mixed cluster, the relative risk of having a rural neighbourhood  
49  
50 be within a gastroenterologist cluster was 0.12 times lower (95%CI 0.01-0.35  $p < 0.001$ ) while the  
51  
52 relative risk of a rural neighborhood being in a surgeon cluster was 5.38 times higher (95%CI  
53  
54 3.48-8.01  $p < 0.001$ ). Furthermore, the relative risk of the highest economic status neighborhood  
55  
56  
57  
58  
59  
60

1  
2  
3 being within a gastroenterology cluster was 1.74 times higher (95%CI 1.14-2.56 p=0.005) while  
4  
5 the relative risk of a surgeon cluster being of the highest socioeconomic status was 0.60 times  
6  
7 lower (95%CI 0.33-1.00 p=0.026). Distance was only significant for gastroenterology clustering  
8  
9 as for every 50 km, the relative risk of being a gastroenterology cluster compared to mixed  
10  
11 cluster was 0.76 times lower (95%CI 0.58-0.93 p=0.001).  
12  
13

14  
15 Table 4 presents the comparison of surgeon clusters directly to gastroenterology clusters.  
16  
17 Compared to gastroenterology clusters, rural neighborhood were 98.95 higher (95%CI 15.3-  
18  
19 427.2 p<0.001) as likely to be in a surgeon cluster. In addition, neighborhoods in the highest as  
20  
21 economic status had relative risk of being in a surgeon cluster that were 0.35 times lower than  
22  
23 being in a gastroenterology cluster. Lastly, for each 50 km further from the hospital a  
24  
25 neighborhood was, it was was 1.37 times likelier to be in a surgeon cluster than a  
26  
27 gastroenterology cluster (95%CI 1.10-1.77 p<0.001).  
28  
29  
30  
31  
32  
33

## 34 INTERPRETATION

35  
36 This study identified significant patterns in the geographic variation of the delivery of  
37  
38 screening colonoscopy care in Canada that were consistent across provinces. Overall, there was a  
39  
40 clear rural/urban divide between surgeon delivered care and gastroenterologist delivered care.  
41  
42 Surgeons performed 53.7% of all screening colonoscopies and more than 73% of screening  
43  
44 colonoscopies in rural areas. Accordingly, rural neighborhoods were nearly 100 more times  
45  
46 likely to be in a surgeon cluster than a gastroenterology cluster (RRR 98.95 95%CI 15.3-427.2  
47  
48 p<0.001) and more than five times as likely to be in a surgeon cluster than a mixed cluster (RRR  
49  
50 5.38 95%CI 3.48-8.01 p<0.001). In non-rural areas, surgeons provided 48.7 % of the overall  
51  
52 screening colonoscopy care, though this was spread around suburban areas and smaller cities  
53  
54  
55  
56  
57  
58  
59  
60



## Colonoscopy provider variation

1  
2  
3 while gastroenterologists clustered within major cities such as Toronto, Vancouver, Edmonton,  
4  
5 Calgary and Ottawa. This division of the delivery of care additionally manifested itself in the fact  
6  
7 that gastroenterologists tended to treat patients of the highest economic status, as well as those  
8  
9 with shorter distances to the public health care facility.  
10  
11

12  
13 Our findings related to the distribution of colonoscopy care in Canada are consistent with  
14  
15 the finding of Baxter et al that surgeons performed 53% of colonoscopies in Ontario<sup>22</sup>; Schultz et  
16  
17 al also found gastroenterologists and surgeons to perform almost the same total number of  
18  
19 procedures, although gastroenterologists tended to perform more procedures per physician.<sup>23</sup>  
20  
21 Variations in provider distribution between urban and rural areas have also been identified in the  
22  
23 literature. Hilsden et al. identified gastroenterologists to primarily provide colonoscopies in large  
24  
25 urban areas, whereas surgeons tended to dominate provision of care in smaller urban and rural  
26  
27 areas in Canada.<sup>15</sup> This study could only look at total numbers and not determine whether  
28  
29 significant clustering exists. This is consistent with our finding that rural neighborhoods had  
30  
31 significantly increased odds of being predominantly served by surgeons compared to mixed  
32  
33 neighborhoods. However, a recent systematic review by Evans et al identified a notable lack of  
34  
35 studies assessing who provides colonoscopy care in rural areas.<sup>16</sup> Lower colorectal cancer  
36  
37 screening rates in rural areas<sup>17,18</sup> suggest a need for increased provision of colonoscopy care in  
38  
39 these regions. Currently, there is evidence that colonoscopies performed by surgeons have  
40  
41 similar morbidity and mortality rates to those performed by gastroenterologists.<sup>14,24,25</sup> In a study  
42  
43 of Ontario residents, Rabeneck et al found that patients who underwent colonoscopy by a non-  
44  
45 gastroenterologist were at significantly increased risk of developing colorectal cancer later.<sup>12</sup> Ko  
46  
47 et al also found that gastroenterologists were significantly more likely to detect and remove  
48  
49 polyps during outpatient colonoscopy compared to other specialties, including general surgery  
50  
51  
52  
53  
54  
55  
56  
57  
58  
59  
60

1  
2  
3 and colorectal surgery.<sup>7</sup> However, Kozbial et al found no significant differences in polyp  
4  
5 detection rate or carcinoma detection rate between general surgeons and internists.<sup>13</sup> Schultz et al  
6  
7 found that gastroenterologists across Canada tended to have higher procedure volume,<sup>23</sup> which  
8  
9 was found to be associated with significant improvement in completion rate.<sup>24</sup> However, other  
10  
11 studies did not find a significant association between endoscopist volume and patient important  
12  
13 outcomes such as later development of colorectal cancer.<sup>22</sup>  
14  
15

16  
17 The findings of this paper have several important applications to healthcare delivery.  
18  
19 Previous work has demonstrated that endoscopy comprises a larger percentage of a surgeon's  
20  
21 practice in rural areas within the United States and surgeons may play a more important role in  
22  
23 these areas for the provision of endoscopic care.<sup>26</sup> This may be due to their respective spectrums  
24  
25 of care as surgeons and gastroenterologists fill distinct but important roles in healthcare system.  
26  
27 These roles seem quite complementary as they allow each to provide colonoscopy care in areas  
28  
29 where the other would not be able. Specifically, in lower density rural areas, where the density  
30  
31 may not allow for many gastroenterologists to have a steady practice, surgeons fill the gaps in  
32  
33 care due to their ubiquity and ability to supplement their endoscopy practice with a surgical  
34  
35 practice. Meanwhile in high density urban areas, gastroenterologists can fill gaps in coverage  
36  
37 where surgeons would likely not be able to meet demand. Recognizing this phenomenon may be  
38  
39 a key for health systems in the effort to ensure access to colonoscopy for all patients and ensure  
40  
41 that inappropriate screening is kept to a minimum due to an efficient delivery of care.<sup>27,28</sup> This  
42  
43 division of care also helps to contextualize findings related to volume and outcomes, as it may  
44  
45 not be possible for all surgeons to have high-volume endoscopy practices. Therefore, in effort to  
46  
47 provide access to colonoscopy care, it may be necessary to recognize this fact when creating  
48  
49 national credentialing guidelines with regards to yearly endoscopy volumes. Guidelines based on  
50  
51  
52  
53  
54  
55  
56  
57  
58  
59  
60

## Colonoscopy provider variation

1  
2  
3 the practice of high-volume urban practitioners may have the effect of limiting access to  
4  
5 colonoscopy care for residents and not giving these residents an equitable choice in their  
6  
7 colonoscopy screening modality. Lastly, when pursuing research in colonoscopy screening  
8  
9 outcomes, it may not be relevant to include all practitioners within the same analysis as lower  
10  
11 volume practitioners, serving mainly rural or low income patients, may not have outcomes that  
12  
13 are generalizable to high-volume urban endoscopists. Therefore, this study is instrumental in  
14  
15 better contextualizing these analyses to ensure generalizable results.  
16  
17  
18

19  
20 This study has several limitations. It only covered colonoscopies that were done in  
21  
22 publicly funded health facilities, and therefore did not include private endoscopy centers.  
23  
24 Considering that most private endoscopy centers would be in urban centers and run by  
25  
26 gastroenterologists, it is unlikely that they would change the overall message of this study, but  
27  
28 rather would likely increase the disparity already found. The study also did not cover all  
29  
30 colonoscopy care, but rather just focused on screening. Therefore, our findings may not be  
31  
32 generalizable to all colonoscopy care. However, the purpose of including only screening  
33  
34 colonoscopies was to encompass an overlapping area and indication for both specialties as many  
35  
36 other indications for colonoscopy would not overlap. Accordingly, we do feel that the findings of  
37  
38 this study are relatively generalizable to all colonoscopy care.  
39  
40  
41  
42

43  
44 This study focused on screening colonoscopy care and clearly demonstrated the division  
45  
46 in delivery of screening colonoscopy care between rural and urban areas. In rural areas, surgeons  
47  
48 were the predominant specialty providing colonoscopy care whereas gastroenterologists  
49  
50 provided much of the care in high density urban areas. This clearly underscores the importance  
51  
52 of both specialties in achieving ubiquitous access to colonoscopy care and help to contextualize  
53  
54 future research on specialty specific outcomes.  
55  
56  
57  
58  
59  
60

1  
2  
3  
4  
5  
6 **ACKNOWLEDGEMENTS:** None  
7  
8  
9

10 **REFERENCES**  
11  
12  
13  
14

- 15 1. Arnold M, Sierra MS, Laversanne M, et al. Global patterns and trends in colorectal cancer  
16 incidence and mortality. *Gut*. 2017;66:683-691.  
17  
18
- 19 2. Muto T, Bussey HJ, Morson BC. The evolution of cancer of the colon and rectum.  
20 *Cancer*. 1975;36:2251-2270.  
21  
22
- 23 3. Telford JJ. Canadian guidelines for colorectal cancer screening. *Can J Gastroenterol*.  
24 2011;25:479-481.  
25  
26
- 27 4. Baxter NN, Goldwasser MA, Paszat LF, et al. Association of colonoscopy and death from  
28 colorectal cancer. *Ann Intern Med*. 2009;150:1-8.  
29  
30
- 31 5. Winawer SJ, Zauber AG, Ho MN, et al. Prevention of Colorectal Cancer by Colonoscopic  
32 Polypectomy. *N Engl J Med*. 1993;329:1977-1981.  
33  
34
- 35 6. Elmunzer BJ, Singal AG, Sussman JB, et al. Comparing the effectiveness of competing  
36 tests for reducing colorectal cancer mortality: a network meta-analysis. *Gastrointest*  
37 *Endosc*. 2015;81:700-709.e3.  
38  
39
- 40 7. Ko CW, Dominitz JA, Green P, Kreuter W, Baldwin L-M. Specialty differences in polyp  
41 detection, removal, and biopsy during colonoscopy. *Am J Med*. 2010;123:528-535.  
42  
43
- 44 8. Provenzale D, Ofiman J, Gralnek I, et al. Gastroenterologist specialist care and care  
45 provided by generalists--an evaluation of effectiveness and efficiency. *Am J*  
46 *Gastroenterol*. 2003;98:21-28.  
47  
48  
49  
50  
51  
52  
53  
54  
55  
56  
57  
58  
59  
60

## Colonoscopy provider variation

- 1  
2  
3 9. Ollington KF, Brelan D, Morgan J, et al. Comparison of adenoma detection rates between  
4 gastroenterologists and colorectal surgeons. *Am Surg*. 2012;78:269-270.  
5  
6
- 7  
8 10. Baxter NN, Warren JL, Barrett MJ, Stukel TA, Doria-Rose VP. Association between  
9 colonoscopy and colorectal cancer mortality in a US cohort according to site of cancer and  
10 colonoscopist specialty. *J Clin Oncol*. 2012;30:2664-2669.  
11  
12
- 13 11. Bielawska B, Day AG, Lieberman DA, Hookey LC. Risk factors for early colonoscopic  
14 perforation include non-gastroenterologist endoscopists: a multivariable analysis. *Clin*  
15 *Gastroenterol Hepatol*. 2014;12:85-92.  
16  
17
- 18 12. Rabeneck L, Paszat LF, Saskin R. Endoscopist specialty is associated with incident  
19 colorectal cancer after a negative colonoscopy. *Clin Gastroenterol Hepatol*. 2010;8:275-  
20 279.  
21  
22
- 23 13. Kozbial K, Reinhart K, Heinze G, et al. High quality of screening colonoscopy in Austria  
24 is not dependent on endoscopist specialty or setting. *Endoscopy*. 2014;47:207-216.  
25  
26
- 27 14. Mehran A, Jaffe P, Efron J, Vernava A, Liberman MA. Colonoscopy: why are general  
28 surgeons being excluded? *Surg Endosc*. 2003;17:1971-1973.  
29  
30
- 31 15. Hilsden RJ, Tepper J, Moayyedi P, Rabeneck L. Who provides gastrointestinal endoscopy  
32 in Canada? *Can J Gastroenterol*. 2007;21:843-846.  
33  
34
- 35 16. Evans D V, Cole AM, Norris TE. Colonoscopy in rural communities: a systematic review  
36 of the frequency and quality. *Rural Remote Health*. 2015;15:3057.  
37  
38
- 39 17. Cole AM, Jackson JE, Doescher M. Urban-rural disparities in colorectal cancer screening:  
40 cross-sectional analysis of 1998-2005 data from the Centers for Disease Control's  
41 Behavioral Risk Factor Surveillance Study. *Cancer Med*. 2012;1:350-356.  
42  
43
- 44 18. Ojinnaka CO, Choi Y, Kum H-C, Bolin JN. Predictors of Colorectal Cancer Screening:  
45  
46  
47  
48  
49  
50  
51  
52  
53  
54  
55  
56  
57  
58  
59  
60

- 1  
2  
3 Does Rurality Play a Role? *J Rural Health*. 2015;31:254-268.  
4  
5  
6 19. Statistics Canada. Boundary files. 2013.  
7  
8 20. Statistics Canada. Table 105-0501 - Health indicator profile, annual estimates, by age  
9 group and sex, Canada, provinces, territories, health regions (2013 boundaries) and peer  
10 groups, occasional, CANSIM (database).  
11  
12  
13 21. Statistics Canada. Table 111-0009 - Family characteristics, summary, annual (number  
14 unless otherwise noted), CANSIM (database).  
15  
16  
17 22. Baxter NN, Sutradhar R, Forbes SS, et al. Analysis of administrative data finds  
18 endoscopist quality measures associated with postcolonoscopy colorectal cancer.  
19  
20  
21  
22  
23  
24  
25  
26  
27 23. Schultz SE, Vinden C, Rabeneck L. Colonoscopy and flexible sigmoidoscopy practice  
28 patterns in Ontario: a population-based study. *Can J Gastroenterol*. 2007;21:431-434.  
29  
30  
31 24. Wexner SD, Garbus JE, Singh JJ, SAGES Colonoscopy Study Outcomes Group. A  
32 prospective analysis of 13,580 colonoscopies. Reevaluation of credentialing guidelines.  
33  
34  
35  
36  
37  
38  
39 25. Wexner SD, Forde KA, Sellers G, et al. How well can surgeons perform colonoscopy?  
40  
41  
42  
43  
44 26. Zuckerman R, Doty B, Bark K, Heneghan S. Rural versus non-rural differences in surgeon  
45 performed endoscopy: results of a national survey. *Am Surg*. 2007;73:903-905.  
46  
47  
48 27. Sheffield KM, Han Y, Kuo Y-F, Riall TS, Goodwin JS. Potentially Inappropriate  
49 Screening Colonoscopy in Medicare Patients. *JAMA Intern Med*. 2013;173:542.  
50  
51  
52 28. Johnson MR, Grubber J, Grambow SC, et al. Physician Non-adherence to Colonoscopy  
53 Interval Guidelines in the Veterans Affairs Healthcare System. *Gastroenterology*.  
54  
55  
56  
57  
58  
59  
60

2015;149:938-951.

**Figure Legends**

Figure 1: Geographic Clustering of Screening Colonoscopy in Canada

Confidential

1  
2  
3  
4  
5  
6  
7  
8  
9  
10  
11  
12  
13  
14  
15  
16  
17  
18  
19  
20  
21  
22  
23  
24  
25  
26  
27  
28  
29  
30  
31  
32  
33  
34  
35  
36  
37  
38  
39  
40  
41  
42  
43  
44  
45  
46  
47  
48  
49  
50  
51  
52  
53  
54  
55  
56  
57  
58  
59  
60

Table 1: Associations between colonoscopy provider and regression covariates

|                              | <b>Gastroenterology</b> | <b>Surgeon</b>     | <b>P value</b> |
|------------------------------|-------------------------|--------------------|----------------|
| Number of providers          | 717                     | 1,169              |                |
| Average annual volume        | 79.4 ( $\pm$ 99.8)      | 54.5 ( $\pm$ 77.9) |                |
| Number of colonoscopies      | 304,948 (46.3)          | 353,165 (53.7)     |                |
| Rural                        | 37,893 (12.4)           | 100,195 (28.4)     | <0.001         |
| Socioeconomic quartile       |                         |                    |                |
| 1                            | 50,010 (16.4)           | 64,145 (18.2)      | <0.001         |
| 2                            | 73,181 (24.0)           | 129,133 (36.6)     |                |
| 3                            | 81,330 (26.7)           | 97,383 (27.6)      |                |
| 4                            | 100,427 (32.93)         | 62,504 (17.7)      |                |
| Distance to hospital (in km) | 21.3 ( $\pm$ 52.6)      | 27.0 ( $\pm$ 65.5) |                |

\* Values represent n, (%) unless otherwise specified

Confidential



Table 2: Hotspots by neighbourhood

|                                 | <b>Gastroenterology</b> | <b>Mixed</b>         | <b>Surgeon</b>       | <b>Total</b>         | <b><i>P</i> value</b> |
|---------------------------------|-------------------------|----------------------|----------------------|----------------------|-----------------------|
| Number of neighbourhoods        | 270                     | 627                  | 217                  | 1,114                |                       |
| Number of colonoscopies         | 148,253                 | 350,970              | 158,890              | 658,113              |                       |
| Number surgeon performed        | 33,643 (22.7)           | 187,604 (53.5)       | 131,918 (83.0)       | 353,165 (53.7)       | <0.001                |
| Rural                           | 2 (0.7)                 | 52 (8.3)             | 75 (34.6)            | 129 (11.6)           | <0.001                |
| Socioeconomic quartile          |                         |                      |                      |                      |                       |
| 1                               | 58 (21.5)               | 153 (24.4)           | 64 (24.5)            | 275 (24.7)           | <0.001                |
| 2                               | 42 (15.6)               | 153 (24.4)           | 84 (38.7)            | 279 (25.0)           |                       |
| 3                               | 61 (22.6)               | 175 (27.9)           | 45 (20.7)            | 281 (25.2)           |                       |
| 4                               | 109 (40.4)              | 146 (23.3)           | 24 (11.1)            | 279 (25.0)           |                       |
| Mean distance ( $\pm$ SD in km) | 17.74 ( $\pm$ 38.2)     | 36.75 ( $\pm$ 122.5) | 59.44 ( $\pm$ 152.0) | 36.56 ( $\pm$ 116.0) | <0.001                |

SD, standard deviation; km, kilometre;

\* Values represent n, (%) unless otherwise specified

Confidential

Table 3: Comparison of specialist clusters vs. mixed

|                                            | <b>RRR (95% CI)</b> | <b>P value</b> |
|--------------------------------------------|---------------------|----------------|
| <b>Gastroenterology clusters vs. mixed</b> |                     |                |
| Rural                                      | 0.12 (0.01-0.35)    | <0.001         |
| Socioeconomic quartile                     |                     |                |
| 1                                          | Reference           |                |
| 2                                          | 0.68 (0.42-1.05)    | 0.040          |
| 3                                          | 0.85 (0.55-1.28)    | 0.197          |
| 4                                          | 1.74 (1.14-2.56)    | 0.005          |
| Distance per 50 km                         | 0.76 (0.58-0.93)    | 0.001          |
| <b>Surgical clusters vs. mixed</b>         |                     |                |
| Rural                                      | 5.38 (3.48-8.01)    | <0.001         |
| Socioeconomic quartile                     |                     |                |
| 1                                          | Reference           |                |
| 2                                          | 1.57 (1.00-2.38)    | 0.025          |
| 3                                          | 0.78 (0.47-1.21)    | 0.120          |
| 4                                          | 0.60 (0.33-1.00)    | 0.026          |
| Distance per 50 km                         | 1.02 (0.96-1.08)    | 0.236          |

RRR, relative risk ratio; CI, confidence interval; km, kilometer;

Table 4: Comparison of Surgical vs. Gastroenterology Clusters

|                                               | <b>RRR (95% CI)</b> | <b>P value</b> |
|-----------------------------------------------|---------------------|----------------|
| <b>Surgical vs. gastroenterology clusters</b> |                     |                |
| Rural                                         | 98.95 (15.3-427.2)  | <0.001         |
| Socioeconomic quartile                        |                     |                |
| 1                                             | Reference           |                |
| 2                                             | 2.39 (1.32-3.99)    | 0.001          |
| 3                                             | 0.94 (0.51-1.57)    | 0.360          |
| 4                                             | 0.35 (0.18-0.61)    | <0.001         |
| Distance per 50km                             | 1.37 (1.10-1.77)    | <0.001         |

RRR, relative risk ratio; CI, confidence interval; km, kilometer;

Confidential

1  
2  
3  
4  
5  
6  
7  
8  
9  
10  
11  
12  
13  
14  
15  
16  
17  
18  
19  
20  
21  
22  
23  
24  
25  
26  
27  
28  
29  
30  
31  
32  
33  
34  
35  
36  
37  
38  
39  
40  
41  
42  
43  
44  
45  
46  
47  
48  
49  
50  
51  
52  
53  
54  
55  
56  
57  
58  
59  
60

### Canadian Screening Colonoscopy Provider Clusters 2008-2015

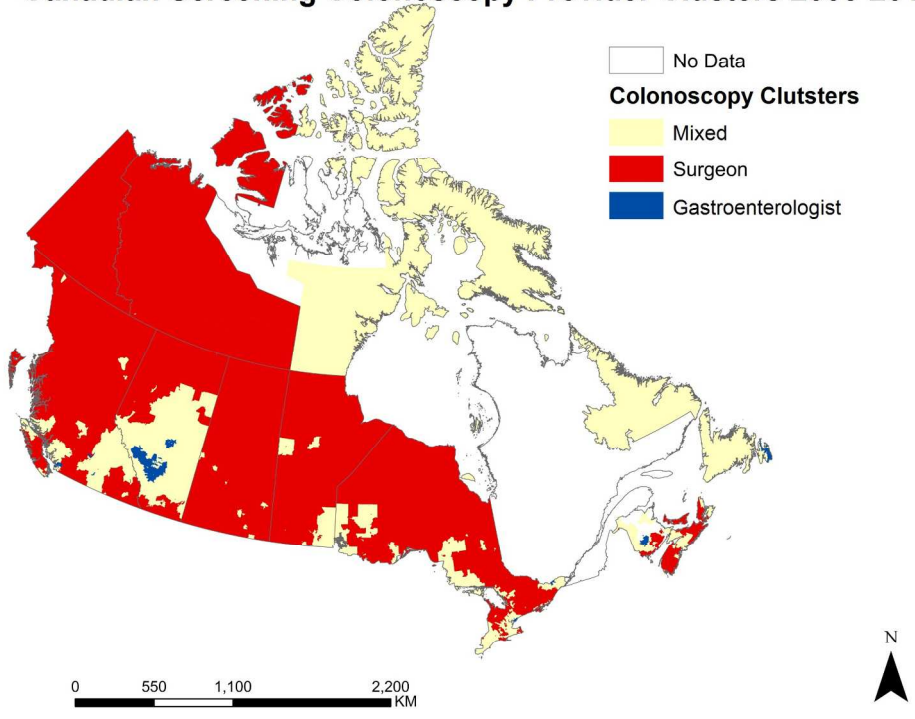

Figure 1: Geographic Clustering of Screening Colonoscopy in Canada

177x137mm (300 x 300 DPI)
